1 **Bacterial Bloodstream Infections in Cameroon: A Systematic Review and Meta-Analysis of**  
2 **Prevalence, and Antibiotic Resistance.**

3 Moise Matakone<sup>1\*‡</sup>, Patrice Landry Koudoum<sup>2‡</sup>, Ravalona Jessica Zemtsa<sup>3</sup>, Sen Claudine Henriette  
4 Ngomtcho<sup>2,4</sup>, Isaac Dah<sup>1,5</sup> and Michel Noubom<sup>2,7</sup>

5 <sup>1</sup>National Veterinary Laboratory (LANAVET), Yaoundé, Cameroon;

6 <sup>2</sup>Faculty of Medicine and Pharmaceutical Sciences, University of Dschang, Dschang P.O. Box 96,  
7 Cameroon;

8 <sup>3</sup>Department of Biochemistry, Faculty of Medicine and Biomedical Sciences, University of Yaoundé I,  
9 Yaoundé, Cameroon;

10 <sup>4</sup>National Public Health Laboratory, Yaoundé, Cameroon;

11 <sup>5</sup>School of Veterinary Medicine and Science, University of Ngaoundéré, Ngaoundéré, Cameroon;

12 <sup>6</sup>Annex Regional Hospital of Dschang (ARHD), Dschang, Cameroon

13 \*Corresponding author: [moisematakone19@gmail.com](mailto:moisematakone19@gmail.com);

14 ‡ These authors contributed equally.

15

16

17

18

19

20

21

22

23

24

25

26

27

28

29

30

31

32

33 **Abstract**

34 **Background:** The paucity of data on the epidemiology of bloodstream infection (BSI) in Low-and  
35 middle-income countries (LMICs) countries hampers its effective prevention and management. This  
36 review sought to provide the current prevalence, bacteriological and antimicrobial resistance profiles of  
37 bacteria implicated in BSI in Cameroon.

38 **Methods:** PubMed and Google Scholar databases were searched to identify relevant articles and  
39 screened according to the PRISMA guidelines. Data was analysed using comprehensive meta-analysis  
40 software. The I<sup>2</sup> was used to evaluate heterogeneity between studies, funnel plot and Egger's test to  
41 evaluate publication bias and random-effects analysis models to calculate pooled prevalence.

42 **Results:** The 10 eligible studies were carried out in only two of the 10 regions of Cameroon and  
43 investigated 4,223 participants, of whom 920 were children under two years old. The overall pooled  
44 prevalence of bacterial BSI was 26.36% (95%CI= 17.51%–37.64%). *Klebsiella* spp. (28.20%; 95%CI=  
45 2.80%–63.60%), *Escherichia coli* (18.94%; 95%CI= 13.02%–26.72%) and *Staphylococcus aureus*  
46 (14.40%; 95%CI= 8.31%–23.81%) were the most incriminated bacteria species. *E. coli* and *Klebsiella*  
47 spp. displayed the highest resistance to amoxicillin (82.6%; 95%CI= 63.3%–92.9 vs 86.4%; 95%CI=  
48 55.9%–97.0%), amoxicillin + clavulanic acid (71.7%; 95%CI= 0.44%–89.2% vs 73.1%; 95%CI=  
49 38.7%–92.1%) and trimethoprim/sulfamethoxazole (76.2%; 95%CI= 51.3%–90.7% vs 69.5%; 95%CI=  
50 52.3–82.6%) respectively. However, meropenem (26.7%; 95%CI= 20.8%–33.7%) and fosfomycin  
51 (14.9%; 95%CI= 9.1%–23.4%) were the least resistant in *E. coli* and *Klebsiella* spp. respectively.  
52 *Staphylococcus aureus* showed high resistance to penicillin (84.4%; 95%CI= 68.1%–93.2%),  
53 erythromycin (41.5%; 95%CI= 28.0%–56.5%) and oxacillin (37.4%; 95%CI= 8.8%–78.7%) and low  
54 resistance to rifampicin (2.9%; 95%CI= 0.6%–13.4%), fusidic acid (8.1%; 95%CI= 3.4%–18.0%) and  
55 vancomycin (13.6%; 95%CI= 2.2%–52.9%).

56 **Conclusion:** This study reports a high prevalence of bacterial BSIs in Cameroon and the high  
57 resistance of these bacteria to common antibiotics. There is a pressing need to conduct BSI surveillance  
58 studies in all regions of Cameroon to generate data for evidence-based measures regarding BSI  
59 prevention and management.

60 **Keywords:** Bloodstream infection, epidemiology, *Enterobacterales*, antibiotic resistance, Cameroon.

61  
62  
63  
64  
65  
66  
67

## 68 **Introduction**

69 Bloodstream infection (BSI) is characterised by positive blood cultures in patients with systemic  
70 symptoms and signs of infection [1]. BSI can eventually lead to sepsis which is a complication  
71 characterised by a life-threatening organ dysfunction caused by a dysregulated host response to  
72 infection [1]. Sepsis and BSI are significantly associated with morbidity and mortality worldwide and  
73 represent a huge public health concern [2]. According to the World Health Organization (WHO), sepsis  
74 accounted for around 20% of all global deaths in 2017, affected 49 million people, and resulted in 11  
75 million fatalities [2, 3]. Vulnerable populations such as pregnant women, elderly persons, patients with  
76 severe comorbidities, newborns, and those in low-resource settings are disproportionately affected [4,  
77 5]. Cases of sepsis and sepsis-related deaths in low-and middle-income countries (LMICs) account for  
78 85% of the global sepsis incidence [3] and hospital mortality due to sepsis is estimated at 19% for  
79 moderate sepsis and 39% for severe sepsis in sub-Saharan Africa (SSA) [6]. Bacteria, especially  
80 *Enterobacteriales* including *Escherichia coli*, *Klebsiella* spp., *Salmonella enterica* and Gram-positive  
81 cocci such as *Staphylococcus aureus* and coagulase-negative *Staphylococcus* are all major species  
82 implicated in BSI and sepsis [7, 8].

83 Inappropriate use of antibiotics is known to exacerbate the burden of Antimicrobial Resistance (AMR)  
84 in bacterial pathogens [9]. Globally, there is an increase in drug resistance to front-line antibiotics  
85 including  $\beta$ -lactams, fluoroquinolones, aminoglycosides, and macrolides [10, 11]. Therefore, AMR is a  
86 major public health concern and is expected to be the leading cause of mortality by 2050 with 10 million  
87 deaths per year if no immediate measures are taken [12]. AMR is a serious challenge in hospital settings  
88 as it worsens the effects of bacterial infections in general especially sepsis, from extended hospital  
89 stays to increased mortality [13, 14].

90 In Cameroon, the bacterial BSI and sepsis and the AMR rate of implicated bacteria are still poorly  
91 documented. Notwithstanding, some studies have been published, it would be important to summarise  
92 these already available data to inform on context-specific epidemiology of BSI in terms of aetiology,  
93 AMR rate and to direct future BSI and sepsis prevention and management efforts in Cameroon. Thus,  
94 in this review, we estimate the pooled proportion of culture-confirmed bacterial BSIs and their AMR  
95 rates in Cameroon.

## 96 **Methods**

97 We conducted this systematic review and meta-analysis following the Preferred Reporting Items for  
98 Systematic Review and Meta-Analysis statement (PRISMA) 2020 guidelines [15] and, the protocol was  
99 registered in the Prospero database (Ref: CRD42023482760, available  
100 from: [https://www.crd.york.ac.uk/prospero/display\\_record.php?ID=CRD42023482760](https://www.crd.york.ac.uk/prospero/display_record.php?ID=CRD42023482760)).

## 101 **Search strategy**

102 The National Library of Medicine database (MEDLINE) was searched through PubMed, along with  
103 Google Scholar and hand search. These databases were searched to find all articles reporting the  
104 prevalence of culture-confirmed bacteria-driven bloodstream infections. Library research was

105 performed using Medical Subject Headings (MeSH) and keywords paired with Boolean operators (**Fig.**  
106 **1**).

### 107 **Eligibility criteria**

108 Three authors independently searched the literature and evaluated the titles and abstracts of papers.  
109 Articles included were studies which (1) reported culture-confirmed bacteria-driven bloodstream  
110 infections in Cameroon, (2) published in peer-reviewed journals and (3) published in English or French  
111 from 2010 up to December 2023. Articles were excluded if (1) the full texts were not assessable and  
112 (2) they were case reports or case series.

### 113 **Study selection**

114 After the literature search, we uploaded all articles to an EndNote (version 20.6) database and  
115 duplicates were removed. Two reviewers did the screening of titles and abstracts to assess whether  
116 specific inclusion criteria were met and non-relevant citations and those that did not meet inclusion  
117 criteria were excluded. Disagreements on whether or not an article should be included or not were  
118 resolved by a third reviewer.

### 119 **Data extraction**

120 Two authors used a Microsoft Excel spreadsheet (2016 version) to extract data from included articles  
121 independently. The first author, publication year, region of study, study design, sample size, age of  
122 study population, the prevalence of BSIs, the proportion of each bacteria causing BSIs and AMR rates  
123 of bacteria groups were extracted. Inconsistencies were resolved through a group consensus.

### 124 **Quality assessment**

125 Quality of included studies was done using the Joanna Briggs Institute revised Critical Appraisal  
126 Checklist [16]. The checklist was applied to each study to assess the eight items with each item awarded  
127 a point for “yes” and the final score for each article added and fell between zero and eight. Any  
128 disagreement among authors was resolved by consensus. A study was considered low-risk when it  
129 scored  $\geq 4$  points.

### 130 **Data analysis**

131 We exported the extracted data to Comprehensive Meta-Analysis Software (version 3.0) for analysis.  
132 Begg and Egger’s regression tests were used to objectively assess publication bias while the funnel  
133 plot was used to visualise this bias [17]. A  $p$ -value  $< 0.05$  was considered statistically significant [18].  
134 Cochran Q statistics assessed the presence and magnitude of heterogeneity between studies.  
135 Quantification of heterogeneity was done using  $I^2$  expressed in percentages. Values of 75, 50 and 25%  
136 were considered as high, medium and low heterogeneity [19] respectively. Subgroup meta-analysis  
137 was conducted according to participant's ages into all ages and paediatric (children under 2 years).

138

139

## 140 **Results**

### 141 **Results of the literature search**

142 The online database search from PubMed and Google Scholar yielded 329 articles and two articles  
143 through the hand search. The duplicates were removed and 314 articles were enrolled for the title and  
144 abstract screening. Finally, 25 articles were screened for full-text review and 10 which responded to the  
145 study objectives were included (**Fig. 2**).

### 146 **Publication bias**

147 When BSI among study participants was analysed, a visual inspection of the funnel plot showed that  
148 there was no evidence of publication bias among the included studies. Similarly, the coefficient (4.89,  
149 95% CI= -5.23, 15.01) for Egger's regression test was not statistically significant (*p-value* = 0.298).

### 150 **Characteristics of included studies**

151 The 10 included studies described a total of 4223 blood cultures, of which 920 (21.79%) were performed  
152 exclusively in the paediatric population (children under 2 years). The studies were conducted in two of  
153 the 10 regions of Cameroon and included patients from only two cities Douala (n=2547; 60.31%) [20-  
154 22] and Yaoundé (n=1676; 39.69%) [23-29]. Most of the studies were cross-sectional (n=08) [20, 22-  
155 26, 28, 29], one longitudinal [27] and one retrospective [21] study but all were of low-risk quality. Only  
156 the cross-sectional studies reported the age of the patients which ranged from 0 to 92 years (**Table 1**).

### 157 **Pooled prevalence and bacterial aetiology of bloodstream infections**

158 The heterogeneity among the included studies was statistically significant ( $I^2= 97,63\%$ ;  $p=0.000$ ). Thus,  
159 we used Random Effect Models to calculate the pooled prevalence of culture-confirmed bacteria-driven  
160 bloodstream infections in Cameroon and their 95% confidence intervals were represented on forest  
161 plots. Blood culture was performed in 4223 patients and 888 were positive for a bacterial BSI. The  
162 bacterial BSI prevalence in this study ranged from 11.93% up to 67.89% and the overall pooled  
163 prevalence was 26.36% (95%CI= 17.51%–37.64%). Additionally, the prevalence in children and all age  
164 subgroups was similar (26.54% and 26.22% respectively) (**Fig. 3**).

165 The main bacterial groups reported in this study were *Enterobacteriales*, *Staphylococci* and  
166 *Streptococci*. Among the *Enterobacteriales* group, *Klebsiella* spp. (28.20%; 95%CI= 2.80%–63.60%),  
167 was the most implicated followed by *Escherichia coli* (18.94%; 95%CI= 13.02%–26.72%), *Enterobacter*  
168 spp. (7.66%; 95%CI= 4.46%–12.83%) and *Salmonella enterica* (7.01%; 95%CI= 3.62%–13.15%)  
169 (**Fig.4**). Seven studies reported gram-positive cocci, of which *Staphylococcus aureus* was the most  
170 implicated (14.40%; 95%CI= 8.31%–23.81%), followed by *Coagulase-negative Staphylococcus*  
171 (8.23%; 95%CI= 2.68%–22.65%) (**Fig. 5**) and *Streptococcus* spp. (4.07%; 95%CI= 2.64%–6.21%) as  
172 presented in **Fig. 6**. Non-fermenting gram-negative bacilli were also recorded in both age groups and  
173 *Acinetobacter* spp. (3.93%; 95%CI=2.13%–7.29%) was the commonly reported followed by  
174 *Pseudomonas* spp. (3.17%; 95%CI= 1.96%–5.07%) (**Fig. 7**).

175

## 176 **Antimicrobial resistance rates of bacterial BSI**

177 This study reported only the pooled AMR rate of the most represented bacteria in each group. Most of  
178 the included studies failed to report the AST of several antibiotics. Overall, both *E. coli* and *Klebsiella*  
179 spp. were highly resistant to amoxicillin 82.6% (95%CI= 63.3%–92.9%) vs 86.4% (95%CI=  
180 55.9%–97.0%), amoxicillin + clavulanic acid 71.7% (95%CI= 0.44%–89.2%) vs 73.1% (95%CI=  
181 38.7%–92.1%) and trimethoprim/sulfamethoxazole 76.2% (95%CI= 51.3%–90.7%) vs 69.5% (95%CI=  
182 52.3%–82.6%) respectively. Additionally, resistance to third and fourth-generation cephalosporins and  
183 monobactam was high among *E. coli*: cefotaxime 46.5% (95%CI= 26.8%–67.3%), ceftazidime 49.9%  
184 (95%CI= 29.5%–70.3%), cefepime 51.5% (95%CI= 10.9%–62.0%), aztreonam 49.9% (95%CI= 40.6%-  
185 59.3%) and *Klebsiella* spp.: cefotaxime 30.4% (95%CI= 9.8%–63.6%), ceftazidime 45.4% (95%CI=  
186 16.8%–77.1%) and aztreonam 54.2% (95%CI= 34.2%–73.0%). However, meropenem 26.7% (95%CI=  
187 20.8–33.7%) and fosfomycin 14.9% (95%CI= 9.1%–23.4%) were the most effective in *E. coli* and  
188 *Klebsiella* spp. respectively (**Table 2**). *Staphylococcus aureus* showed high resistance to penicillin  
189 84.4% (95%CI= 68.1%–93.2%), erythromycin 41.5% (95%CI= 28.0%–56.5%) and oxacillin 37.4%  
190 (95%CI= 8.8%–78.7%). However, a low resistance rate of *Staphylococcus aureus* was recorded in  
191 non- $\beta$ -lactams antibiotics including rifampicin 2.9% (95%CI= 0.6%–13.4%), fusidic acid 8.1% (95%CI=  
192 3.4%–18.0%) and vancomycin 13.6% (95%CI= 2.2%–52.9%) and cefoxitin 18.9% (95%CI=  
193 12.0%–82.1%) was the most effective  $\beta$ -lactams. In the CONS group, a high resistance rate was  
194 registered against penicillin 89.9% (95%CI= 66.0%–97.6%), trimethoprim/sulfamethoxazole 52.9%  
195 (95%CI= 42.1%–63.5%) and oxacillin 50.7% (95%CI= 25.0%–76.1%) while cefoxitin 14.9% (95%CI=  
196 11%–73.6%) and fusidic acid 25.5% (95%CI= 17.4%–35.6%) were the most effective (**Table 3**).

## 197 **Discussion**

198 This review aimed to determine the pooled prevalence of bacterial BSIs and the AMR rates of implicated  
199 bacteria in Cameroon. The 10 studies selected for this review described 4223 blood cultures and the  
200 overall pooled prevalence of BSI in was 26.36%. This prevalence is higher than those reported in Africa  
201 by Reddy *et al* (2010) and in Africa and Asia by Marchello *et al* (2019) which were 7.4% and 10.8%  
202 respectively [30, 31]. However, studies conducted in Ethiopia by Bitew *et al* (2023), Legese *et al* (2022)  
203 and Abebe *et al* (2021) documented a similar prevalence of BSI [32-34]. This review also recorded a  
204 high prevalence of 26.54% of BSI in children under 2 years old. A similar pooled prevalence of neonatal  
205 sepsis in East Africa was documented by Abate *et al* (2020) [35] while Belachew and Tewabe (2020)  
206 recorded a pooled prevalence of neonatal sepsis in Ethiopia of 49.98% [36]. The observed difference  
207 and the high prevalence either in children and all age groups in this review may be due to the small  
208 sample size of many included studies [20, 22, 27, 28], the study design as well as the study periods.  
209 The study revealed that *Enterobacteriales* including *Klebsiella* spp. (28.20%) and *Escherichia coli*  
210 (18.94%) were the leading bacteria implicated in the BSI. Studies conducted in several low and middle-  
211 income countries have demonstrated the high implication of these bacteria in bloodstream infections  
212 and sepsis especially in hospital settings [10, 34, 37]. However, these results were contradictory to  
213 those recorded by Wattal *et al* (2020) and Reddy *et al* (2010) where *Salmonella* spp. was the leading

214 cause of BSI and sepsis [11, 30]. This contradiction might be due to the bacterial identification methods  
215 used poorly described in some studies which can considerably vary depending on the laboratory [20,  
216 21, 27].

217 The most frequent *Enterobacterales* reported in this review showed a high resistance to  $\beta$ -lactam  
218 antibiotics especially third and fourth-generation cephalosporins and monobactam. This might indicate  
219 the production of  $\beta$ -lactamases particularly the extended-spectrum  $\beta$ -lactamase enzymes by most of  
220 these bacteria even though most of the included studies failed to report the resistance phenotypes.

### 221 **Limitations**

222 The statements and conclusions in this review cannot be generalised to Cameroon as the included  
223 studies investigated only two regions and were conducted in a small sample size. Also, the study was  
224 unable to precise whether the BSI was community or hospital-acquired. Finally, the study failed to report  
225 AMR among several bacteria and the resistance phenotypes of implicated bacteria.

### 226 **Conclusion**

227 The prevalence of bacterial bloodstream infection in this study is elevated in both paediatric and adult  
228 populations. *Enterobacterales* including *Klebsiella* spp. and *Escherichia coli* and Gram-positive cocci  
229 particularly *Staphylococcus aureus* remain the leading causes of bloodstream infection. Antibiotic  
230 resistance was higher to  $\beta$ -lactam in both *Enterobacterales* and Gram-positive cocci. This study may  
231 help clinicians optimise their antibiotic prescription protocol in the early management of bacterial  
232 bloodstream infection in the absence of antibiotic susceptibility testing results. The review also calls for  
233 researchers to make more effort to produce AMR data to permit policymakers and stakeholders a better  
234 bloodstream infection management and prevention in Cameroon.

### 235 **Conflict of interest**

236 The authors declare no conflict of interest

### 237 **Authors contributions**

238 MM conceived and designed the study. MM and PLK coordinated the literature search. PKL, RJZ and  
239 MM undertook data extraction, quality assessment and statistical analysis. MM, PLK, and RJZ prepared  
240 the first draft of the manuscript. ID, SCHN and MN critically reviewed the manuscript. All authors read  
241 and approved the final version of the manuscript.

### 242 **Funding**

243 The study was not funded.

### 244 **References**

245 [1]. Singer M, Deutschman CS, Seymour CW, Shankar-Hari M, Annane D, Bauer M, *et al.* The  
246 Third International Consensus Definitions for Sepsis and Septic Shock (Sepsis-3). *Jama.*  
247 2016;315(8):801-10.

- 248 [2]. WHO. Global report on the epidemiology and burden of sepsis: Current evidence, identifying  
249 gaps and future directions. 2020.
- 250 [3]. Rudd KE, Johnson SC, Agesa KM, Shackelford KA, Tsoi D, Kievlan DR, *et al.* Global, regional,  
251 and national sepsis incidence and mortality, 1990-2017: analysis for the Global Burden of Disease  
252 Study. *Lancet*. 2020;395(10219):200-11.
- 253 [4]. Cheng AC, West TE, Limmathurotsakul D, Peacock SJ. Strategies to reduce mortality from  
254 bacterial sepsis in adults in developing countries. *PLoS Med*. 2008;5(8):e175.
- 255 [5]. Rhee C, Jones TM, Hamad Y, Pande A, Varon J, O'Brien C, *et al.* Prevalence, Underlying  
256 Causes, and Preventability of Sepsis-Associated Mortality in US Acute Care Hospitals. *JAMA Netw*  
257 *Open*. 2019;2(2):e187571.
- 258 [6]. Lewis JM, Feasey NA, Rylance J. Aetiology and outcomes of sepsis in adults in sub-Saharan  
259 Africa: a systematic review and meta-analysis. *Critical Care*. 2019;23(1):212.
- 260 [7]. Timsit JF, Ruppé E, Barbier F, Tabah A, Bassetti M. Bloodstream infections in critically ill  
261 patients: an expert statement. *Intensive Care Med*. 2020;46(2):266-84.
- 262 [8]. Mun SJ, Kim S-H, Kim H-T, Moon C, Wi YM. The epidemiology of bloodstream infection  
263 contributing to mortality: the difference between community-acquired, healthcare-associated, and  
264 hospital-acquired infections. *BMC Infectious Diseases*. 2022;22(1).
- 265 [9]. Blair JM, Webber MA, Baylay AJ, Ogbolu DO, Piddock LJ. Molecular mechanisms of antibiotic  
266 resistance. *Nat Rev Microbiol*. 2015;13(1):42-51.
- 267 [10]. Ombelet S, Kpossou G, Kotchare C, Agbobli E, Sogbo F, Massou F, *et al.* Blood culture  
268 surveillance in a secondary care hospital in Benin: epidemiology of bloodstream infection pathogens  
269 and antimicrobial resistance. *BMC Infect Dis*. 2022;22(1):119.
- 270 [11]. Wattal C, Goel N. Pediatric Blood Cultures and Antibiotic Resistance: An Overview. *Indian J*  
271 *Pediatr*. 2020;87(2):125-31.
- 272 [12]. O'Neill J. Tackling drug-resistance infections globally: final report and recommendations, 2016.  
273 Available: [https://amr-review.org/sites/default/files/160518\\_Final%20paper\\_with%20cover.pdf](https://amr-review.org/sites/default/files/160518_Final%20paper_with%20cover.pdf)  
274 [Accessed on 1 Jul 2023] 2016 [
- 275 [13]. Chaurasia S, Sivanandan S, Agarwal R, Ellis S, Sharland M, Sankar MJ. Neonatal sepsis in  
276 South Asia: huge burden and spiralling antimicrobial resistance. *Bmj*. 2019;364:k5314.
- 277 [14]. Murray CJL, Ikuta KS, Sharara F, Swetschinski L, Robles Aguilar G, Gray A, *et al.* Global  
278 burden of bacterial antimicrobial resistance in 2019: a systematic analysis. *The Lancet*.  
279 2022;399(10325):629-55.
- 280 [15]. Page MJ, McKenzie JE, Bossuyt PM, Boutron I, Hoffmann TC, Mulrow CD, *et al.* The PRISMA  
281 2020 statement: An updated guideline for reporting systematic reviews. *PLoS Med*.  
282 2021;18(3):e1003583.
- 283 [16]. Joanna Briggs Institute. Critical-Appraisal-Tools—Critical Appraisal Tools | JBI. 2022. Available  
284 online: <https://jbi.global/critical-appraisal-tools> (accessed on 07 November 2023).
- 285 [17]. Egger M, Davey Smith G, Schneider M, Minder C. Bias in meta-analysis detected by a simple,  
286 graphical test. *Bmj*. 1997;315(7109):629-34.



- 287 [18]. Fletcher J. What is heterogeneity and is it important? *Bmj*. 2007;334(7584):94-6.
- 288 [19]. Higgins JP, Thompson SG, Deeks JJ, Altman DG. Measuring inconsistency in meta-analyses.  
289 *Bmj*. 2003;327(7414):557-60.
- 290 [20]. Kemeze S, Moudze B, Chiabi A, Eposse C, Kaya A, Mbangue M, *et al*. Profil clinique et  
291 bactériologique des infections néonatales bactériennes à l'Hôpital Laquintinie de Douala, Cameroun.  
292 *The Pan African Medical Journal*. 2016;23.
- 293 [21]. Okalla Ebongue C, Mefo'o JP, Te N, Moukoko E, Adiogo D, Beyiha G. Profil Bactériologique et  
294 sensibilité aux antibiotiques des isolats d'hémoculture (2006 – 2011) à Douala, Cameroun. *Revue*  
295 *Maliennne d'Infectiologie et de Microbiologie*. 2014;2.
- 296 [22]. Teghonong J, Okalla Ebongue C, Yadufashije C, Kojom LP, Adiogo D. Phenotypic  
297 Characteristics of *Klebsiella pneumoniae* Extended Spectrum  $\beta$ -Lactamases Producers Isolated in  
298 Hospitals in the Littoral Region, Cameroon. *European Journal of Clinical Microbiology*. 2020;6:9-13.
- 299 [23]. Carole Suzie Lacmago Titsamp HKG, Simon Ngamli Fewou. Bloodstream infections initiated  
300 by ESBL-producing *Escherichia coli* in neonates and infants at two hospitals in Yaoundé, Cameroon.  
301 *International Journal of Biological and Chemical Sciences*. 2021;15(3).
- 302 [24]. Chiabi A, Djoupomb M, Mah E, Nguetack S, Mbuagbaw L, Zafack J, *et al*. The clinical and  
303 bacteriological spectrum of neonatal sepsis in a tertiary hospital in yaounde, cameroon. *Iran J Pediatr*.  
304 2011;21(4):441-8.
- 305 [25]. Djuikoue CI, Djouela Djoulako PD, Wouambo RK, Lacmago ST, Dayomo A, Kamga HG, *et al*.  
306 Prevalence of *Escherichia coli* Producing Extended Spectrum Beta-Lactamase (ESBL) Driven  
307 Septicaemia in Children Aged 0–2 Years in Two Districts Hospitals in Yaounde, Cameroon. *Bacteria*.  
308 2022;1(4):294-301.
- 309 [26]. Kamga H, Njunda A, Nde P, Assob J, Nsagha D, Weledji P. Prevalence of septicaemia and  
310 antibiotic sensitivity pattern of bacterial isolates at the University Teaching Hospital, Yaoundé,  
311 Cameroon. *African Journal of Clinical and Experimental Microbiology*. 2011;12(1).
- 312 [27]. Nouetchognou JS, Ateudjieu J, Jemea B, Mesumbe EN, Mbanya D. Surveillance of nosocomial  
313 infections in the Yaounde University Teaching Hospital, Cameroon. *BMC Res Notes*. 2016;9(1):505.
- 314 [28]. Yimtchi LCN, Pokam BDT, Baiye AW, Betbeui AC, Gonsu HK, Djakissam W. Antibiotic  
315 Susceptibility Patterns of Bacteria Associated with Sepsis among Hospitalized Patients in the Yaoundé  
316 University Teaching Hospital—Cameroon. *Open Journal of Medical Microbiology*. 2023;13(1):101-15.
- 317 [29]. Zefack JT, Ambe NF, Bobga TP, Ketum AS, Awambeng DN, Kelly CN, *et al*. Bacteriological  
318 Profile and Antimicrobial Sensitivity Pattern of Blood Culture Isolates among Septicemia Suspected  
319 Patients in the University Teaching Hospital (UTH) Yaoundé, Cameroon. *International Journal of Trend*  
320 *in Scientific Research and Development*. 2020;4(5).
- 321 [30]. Reddy EA, Shaw AV, Crump JA. Community-acquired bloodstream infections in Africa: a  
322 systematic review and meta-analysis. *The Lancet infectious diseases*. 2010;10(6):417-32.
- 323 [31]. Marchello CS, Dale AP, Pisharody S, Rubach MP, Crump JA. A Systematic Review and Meta-  
324 analysis of the Prevalence of Community-Onset Bloodstream Infections among Hospitalized Patients  
325 in Africa and Asia. *Antimicrob Agents Chemother*. 2019;64(1).

- 326 [32]. Bitew A, Adane A, Abdeta A. Bacteriological spectrum, extended-spectrum  $\beta$ -lactamase  
327 production and antimicrobial resistance pattern among patients with bloodstream infection in Addis  
328 Ababa. *Scientific Reports*. 2023;13(1).
- 329 [33]. Abebe W, Tegene B, Feleke T, Sharew B. Bacterial Bloodstream Infections and their  
330 Antimicrobial Susceptibility Patterns in Children and Adults in Ethiopia: a 6-Year Retrospective Study.  
331 *Clin Lab*. 2021;67(11).
- 332 [34]. Legese MH, Asrat D, Swedberg G, Hasan B, Mekasha A, Getahun T, *et al*. Sepsis: emerging  
333 pathogens and antimicrobial resistance in Ethiopian referral hospitals. *Antimicrobial Resistance &*  
334 *Infection Control*. 2022;11(1):83.
- 335 [35]. Abate BB, Kasie AM, Reta MA, Kassaw MW. Neonatal sepsis and its associated factors in East  
336 Africa: a systematic review and meta-analysis. *International Journal of Public Health*. 2020;65(9):1623-  
337 33.
- 338 [36]. Belachew A, Tewabe T. Neonatal sepsis and its association with birth weight and gestational  
339 age among admitted neonates in Ethiopia: systematic review and meta-analysis. *BMC Pediatrics*.  
340 2020;20(1).
- 341 [37]. Solomon S, Akeju O, Odumade OA, Ambachew R, Gebreyohannes Z, Van Wickle K, *et al*.  
342 Prevalence and risk factors for antimicrobial resistance among newborns with gram-negative sepsis.  
343 *PLOS ONE*. 2021;16(8):e0255410.

(antimicrobial OR antibacterial OR antibiotics OR antibiotiques OR antimicrobial resistance OR antibiotic resistance OR multiresistance OR multidrug resistance) OR (bacteria OR bactéries OR *Enterobacterales* OR *Enterobacteriaceae* OR entérobactéries OR *Escherichia coli* OR *E. coli* OR *Klebsiella* OR *Staphylococcus* OR *Salmonella* OR Typhoid OR *Enterobacter* OR *Pseudomonas* OR *Acinetobacter* OR *Streptococcus* OR coagulase negative OR gram negative OR gram positive) AND (bloodstream infections OR hémoculture OR hemoculture OR sepsis OR septicemia OR septicaemia OR septicémie OR neonatal sepsis) AND (Cameroon OR Cameroun).

Fig. 1: Search terms used to identify relevant literature from PubMed and Google Scholar

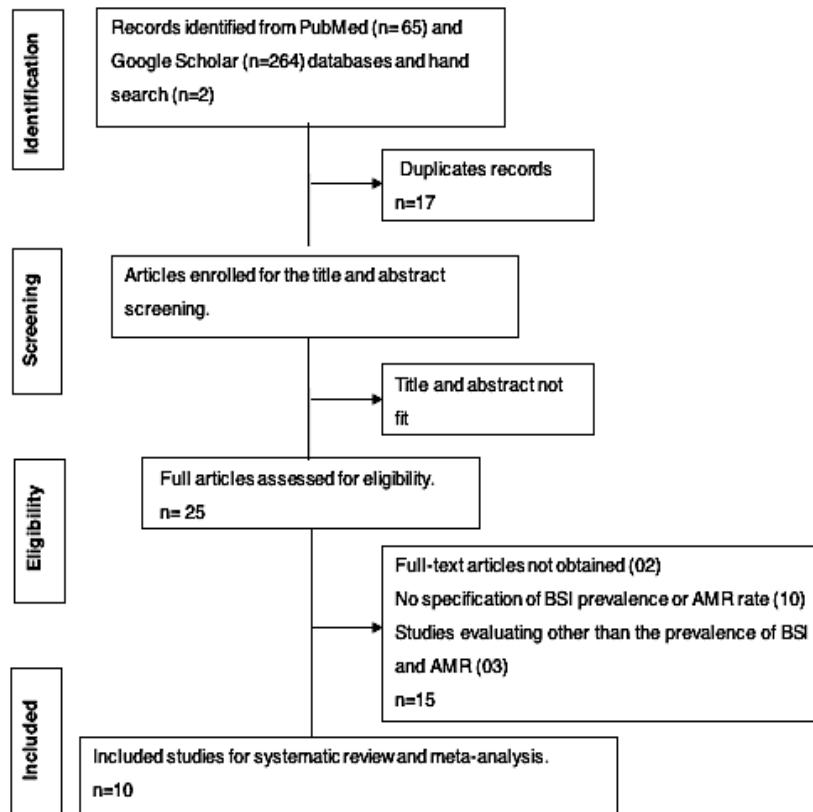

Fig. 2: PRISMA flow chart of the study selection process

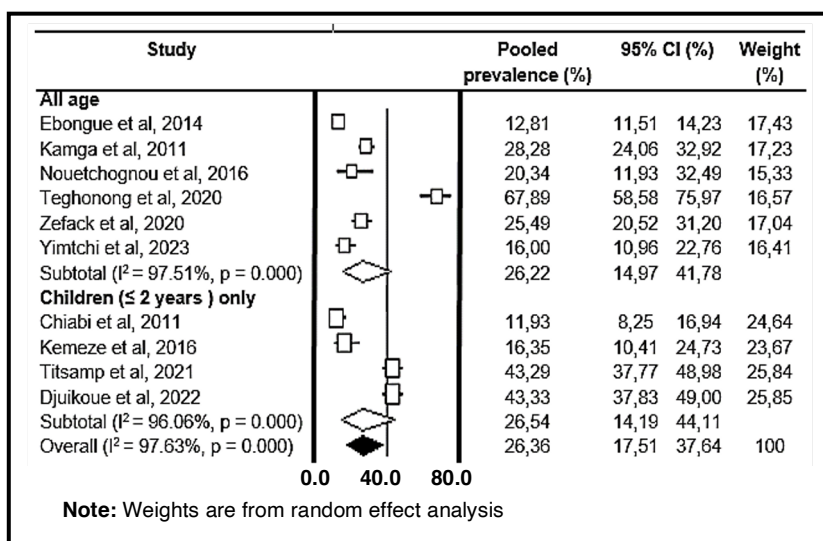

Fig. 3: Forest plot of pooled prevalence of culture-confirmed bacterial bloodstream infections in Cameroon

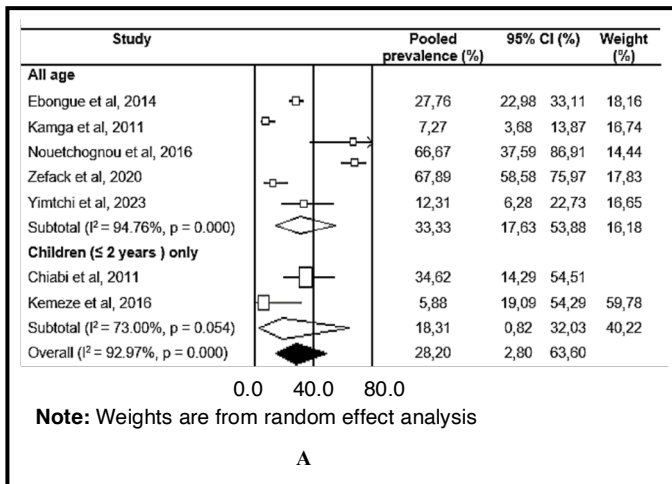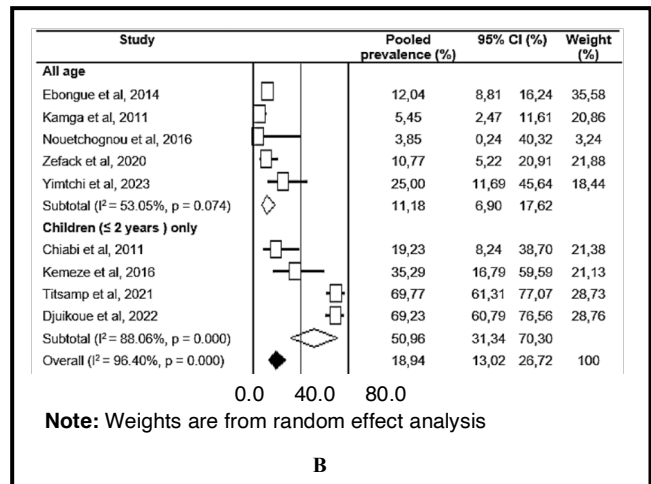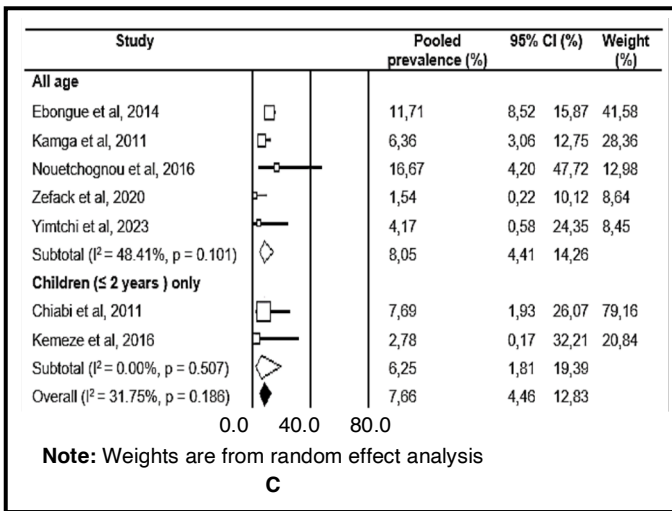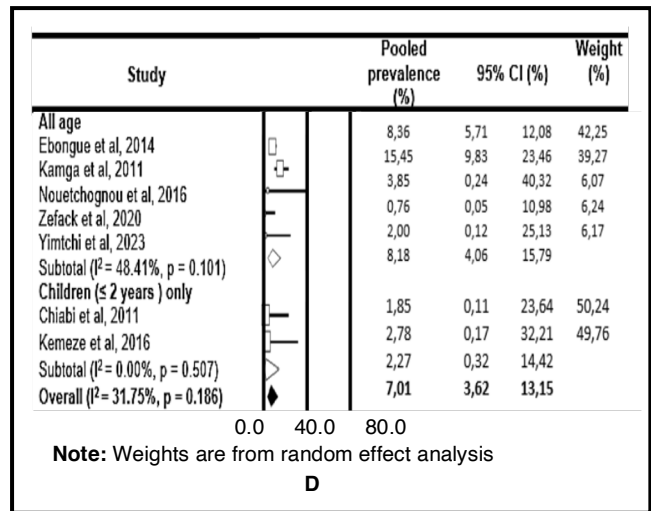

Fig. 4: Forest plot of pooled prevalence of *Enterobacteriales*-driven BSI in Cameroon.  
**A:** *Klebsiella* spp. ; **B:** *Escherichia coli*; **C:** *Enterobacter* spp. and **D:** *Salmonella enterica*

344  
345  
346  
347  
348  
349  
350

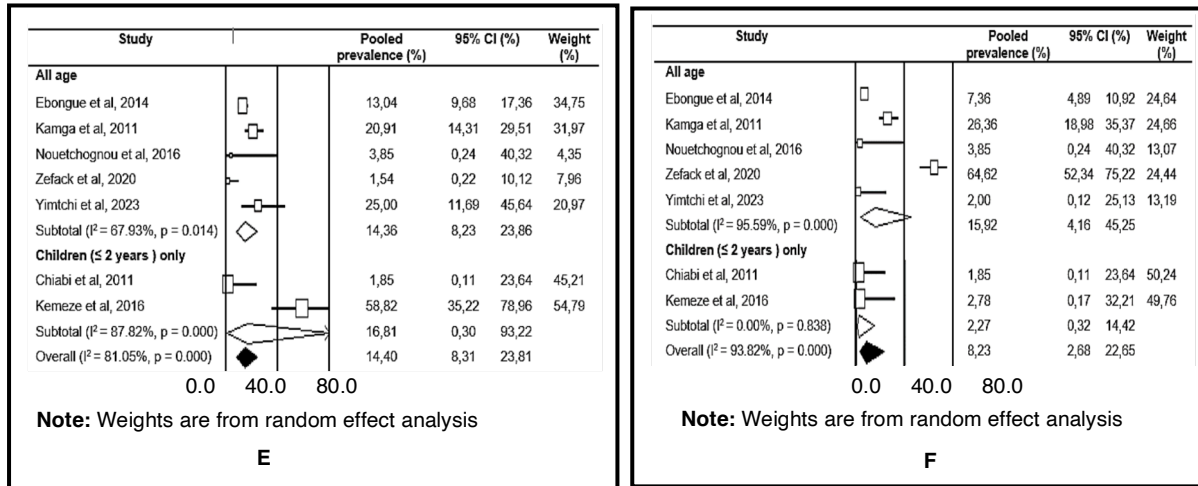

351  
352  
353  
354

**Fig. 5:** Forest plot of pooled prevalence of *Staphylococci*-driven BSI in Cameroon.  
E: *Staphylococcus aureus* and F: Coagulase negative *Staphylococci*

355  
356  
357  
358  
359  
360  
361  
362  
363

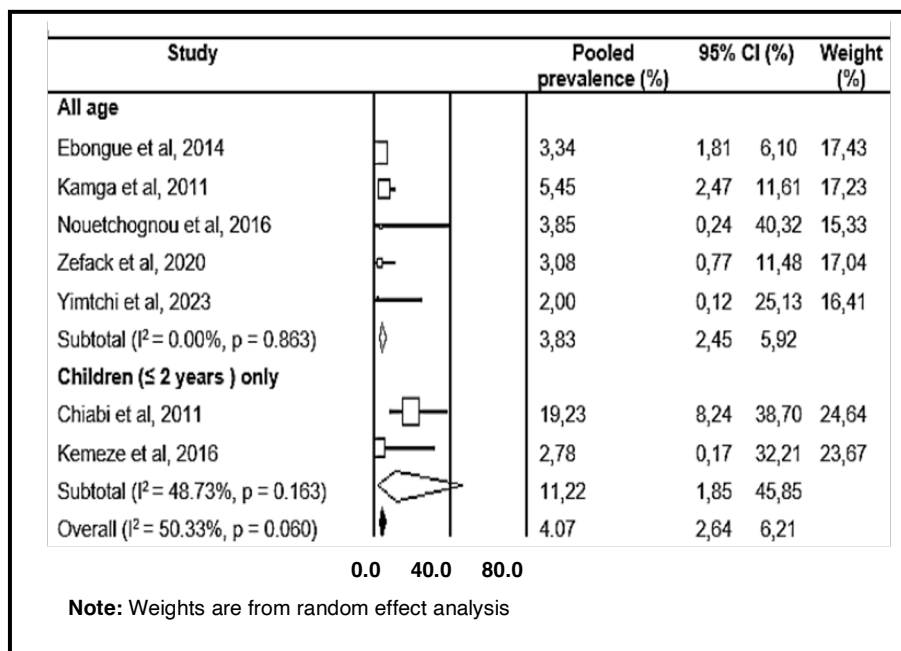

364

**Fig. 6:** Forest plot of pooled prevalence of *Streptococcus* spp. driven bloodstream infections in Cameroon

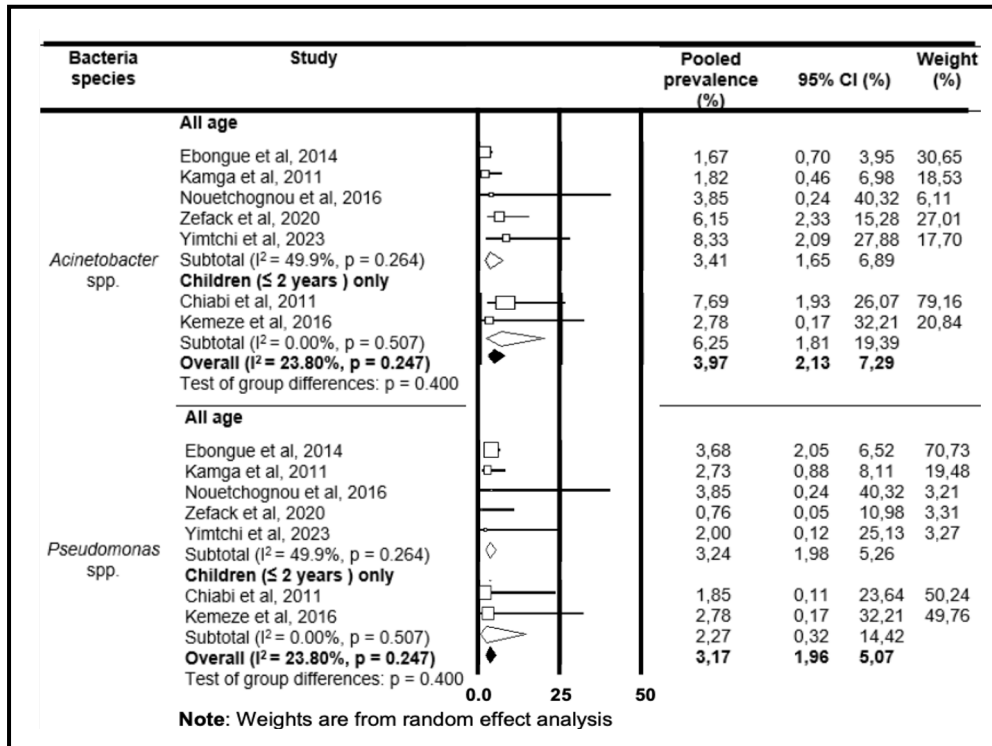

365 **Fig. 7:** Forest plot of pooled prevalence of non-fermenting Gram-negative bacteria-driven bloodstream infections  
366 in Cameroon

**Table 1:** Summary characteristics of studies included in the meta-analysis

| <b>Study period</b>         | <b>Study type</b> | <b>City</b> | <b>Population size</b> | <b>Age range</b> | <b>Positive cultures (%)</b> | <b>Quality</b> | <b>Authors Study period</b>      |
|-----------------------------|-------------------|-------------|------------------------|------------------|------------------------------|----------------|----------------------------------|
| January-April 2018          | Cross-sectional   | Yaoundé     | 255                    | 0-82 years       | 65 (25.50)                   | Low-risk       | Zefack <i>et al</i> , 2020       |
| August-October 2017         | Cross-sectional   | Yaoundé     | 298                    | 0-48 weeks       | 129 (43.30)                  | Low-risk       | Titsamp <i>et al</i> , 2021      |
| August 2019-March 2020      | Cross-sectional   | Yaoundé     | 300                    | 0-2 years        | 130 (43.33)                  | Low-risk       | Djuikoue <i>et al</i> , 2022     |
| March-June 2015             | Cross-sectional   | Douala      | 104                    | 0-28 days        | 17 (16.34)                   | Low-risk       | Kemeze <i>et al</i> , 2016       |
| September 2013 - March 2014 | Longitudinal      | Yaoundé     | 59                     | NA               | 12 (20.34)                   | Low-risk       | Nouetchognou <i>et al</i> , 2016 |
| 2006-2011                   | Retrospective     | Douala      | 2334                   | NA               | 299 (12.81)                  | Low-risk       | Ebongue <i>et al</i> , 2014      |
| January-June 2010           | Cross-sectional   | Yaoundé     | 396                    | 0->76 years      | 112 (28.30)                  | Low-risk       | Kamga <i>et al</i> , 2011        |
| November 2008- May 2009     | Cross-sectional   | Yaoundé     | 218                    | 0-28 days        | 26 (11.92)                   | Low-risk       | Chiabi <i>et al</i> , 2011       |
| November 2021- March 2022   | Cross-sectional   | Yaoundé     | 150                    | 10-92 years      | 24 (16)                      | Low-risk       | Yimtchi <i>et al</i> , 2023      |
| January 2016- February 2017 | Cross-sectional   | Douala      | 109                    | >1-71 years      | 74 (67.89)                   | Low-risk       | Teghonong <i>et al</i> , 2020    |

**Table 2:** Pooled prevalence of antibiotic resistance of *E. coli* and *Klebsiella* spp. isolated from bloodstream infections in Cameroon

| Bacteria                          | Antibiotics                   | Number of studies | Number of isolates | Pooled prevalence of AMR (95% CI) |
|-----------------------------------|-------------------------------|-------------------|--------------------|-----------------------------------|
| <i>E. coli</i><br>N = 281         | Amoxicillin                   | 5                 | 275                | 82.6 (63.3-92.9)                  |
|                                   | Amoxicillin + Clavulanic acid | 5                 | 276                | 71.7 (0.44-89.2)                  |
|                                   | Cefotaxime                    | 3                 | 263                | 46.5 (26.8-67.3)                  |
|                                   | Ceftazidime                   | 5                 | 274                | 49.9 (29.5-70.3)                  |
|                                   | Cefepime                      | 3                 | 187                | 51.5 (10.9-62.0)                  |
|                                   | Cefoxitin                     | 6                 | 281                | 33.2 (18.5-52.0)                  |
|                                   | Aztreonam                     | 4                 | 108                | 49.9 (40.6-59.3)                  |
|                                   | Meropenem                     | 3                 | 180                | 26.7 (20.8-33.7)                  |
|                                   | Amikacin                      | 5                 | 274                | 37.5 (18.7-61.1)                  |
|                                   | Gentamicin                    | 6                 | 281                | 49.5 (37.3-61.7)                  |
|                                   | Ciprofloxacin                 | 5                 | 191                | 41.7 (32.6-51.4)                  |
|                                   | Nalidixic acid                | 3                 | 185                | 34.6 (28.1-41.7)                  |
|                                   | Trimethoprim/Sulfamethoxazole | 5                 | 275                | 76.2 (51.3-90.7)                  |
| <i>Klebsiella</i> spp.<br>N = 115 | Amoxicillin                   | 4                 | 107                | 86.4 (55.9-97.0)                  |
|                                   | Amoxicillin + Clavulanic acid | 4                 | 99                 | 73.1 (38.7-92.1)                  |
|                                   | Cefotaxime                    | 3                 | 99                 | 30.4 (9.8-63.6)                   |
|                                   | Ceftazidime                   | 3                 | 99                 | 45.4 (16.8-77.1)                  |
|                                   | Cefoxitin                     | 4                 | 107                | 35.8 (19.5-56.3)                  |
|                                   | Aztreonam                     | 3                 | 24                 | 54.2 (34.2-73.0)                  |
|                                   | Fosfomycin                    | 3                 | 99                 | 14.9 (9.1-23.4)                   |
|                                   | Amikacin                      | 4                 | 107                | 26.8 (6.1-67.2)                   |
|                                   | Gentamicin                    | 5                 | 115                | 44.8 (35.6-54.3)                  |
|                                   | Ciprofloxacin                 | 5                 | 115                | 56.5 (29.9-79.8)                  |
|                                   | Trimethoprim/Sulfamethoxazole | 4                 | 107                | 69.5 (52.3-82.6)                  |



**Table 3:** Pooled prevalence of antibiotic resistance of *S. aureus* and Coagulase Negative *Staphylococcus* (CONS) isolated from bloodstream infections in Cameroon

| <b>Bacteria</b>            | <b>Antibiotics</b>            | <b>Number of studies</b> | <b>Total number of isolates</b> | <b>Pooled prevalence of AMR (95% CI)</b> |
|----------------------------|-------------------------------|--------------------------|---------------------------------|------------------------------------------|
| <i>S. aureus</i><br>N = 68 | Penicillin                    | 2                        | 61                              | 84.4 (68.1-93.2)                         |
|                            | Oxacillin                     | 3                        | 62                              | 37.4 (8.8-78.7)                          |
|                            | Cefoxitin                     | 3                        | 29                              | 18.9 (12.0-82.1)                         |
|                            | Gentamicin                    | 4                        | 68                              | 30.2 (20.3-42.3)                         |
|                            | Erythromycin                  | 4                        | 68                              | 41.5 (28.0-56.5)                         |
|                            | Lincosamin                    | 2                        | 62                              | 27.4 (3.6-79.1)                          |
|                            | Tetracycline                  | 4                        | 68                              | 29.3 (5.6-74.2)                          |
|                            | Rifampicin                    | 3                        | 61                              | 2.9 (0.6-13.4)                           |
|                            | Trimethoprim/Sulfamethoxazole | 3                        | 62                              | 29.8 (19.6-42.5)                         |
|                            | Fusidic acid                  | 3                        | 62                              | 8.1 (3.4-18.0)                           |
| Vancomycin                 | 3                             | 68                       | 13.6 (2.2-52.9)                 |                                          |
| CONS<br>N = 93             | Penicillin                    | 3                        | 93                              | 89.9 (66.0-97.6)                         |
|                            | Oxacillin                     | 3                        | 93                              | 50.7 (25.0-76.1)                         |
|                            | Cefoxitin                     | 2                        | 71                              | 14.9 (11-73.6)                           |
|                            | Gentamicin                    | 3                        | 93                              | 36.7 (18.7-59.4)                         |
|                            | Erythromycin                  | 3                        | 93                              | 46.8 (27.3-67.4)                         |
|                            | Lincosamin                    | 3                        | 93                              | 42.0 (32.2-52.5)                         |
|                            | Tetracycline                  | 3                        | 93                              | 41.7 (27.0-58.1)                         |
|                            | Trimethoprim/Sulfamethoxazole | 3                        | 93                              | 52.9 (42.1-63.5)                         |
|                            | Fusidic acid                  | 3                        | 93                              | 25.5 (17.4-35.6)                         |
|                            | Vancomycin                    | 3                        | 93                              | 30 (14.4-53.2)                           |
